# Supplementary material for: Influence of morphology on the performance of ZnO-based dye-sensitized solar cells
Source: Royal Society of Chemistry journal article supplement (doi:10.1039/c5ra25618f), 2016-01-01
Supplement: c5ra25618f1.pdf [file c5ra25618f1.pdf]

## Influence of Morphology on the Performance of ZnO-based Dye-sensitized Solar Cells

F.I. Lizama-Tzec<sup>a</sup>, R. García-Rodríguez<sup>a</sup>, G. Rodríguez-Gattorno<sup>a</sup>, E. J. Canto-Aguilar<sup>a</sup>, A.G. Vega-Poot<sup>a</sup>, B. E. Heredia-Cervera<sup>a</sup>, J. Villanueva-Cab<sup>b</sup>, N. Morales Flores<sup>c</sup>, U. Pal<sup>b,\*</sup>, G. Oskam<sup>a,\*</sup>

<sup>a</sup>*Department of Applied Physics, CINVESTAV-IPN  
Mérida, Yuc. 97310, México*

<sup>b</sup>*Instituto de Física, Benemérita Universidad Autónoma de Puebla,  
Puebla, Pue. 72570, México.*

<sup>c</sup>*Centro de Investigación en Dispositivos Semiconductores, ICUAP, Benemérita Universidad  
Autónoma de Puebla, Puebla, Pue. 72570, México.*

[oskam@mda.cinvestav.mx](mailto:oskam@mda.cinvestav.mx); [umapadapal@hotmail.com](mailto:umapadapal@hotmail.com)

### Supporting Information

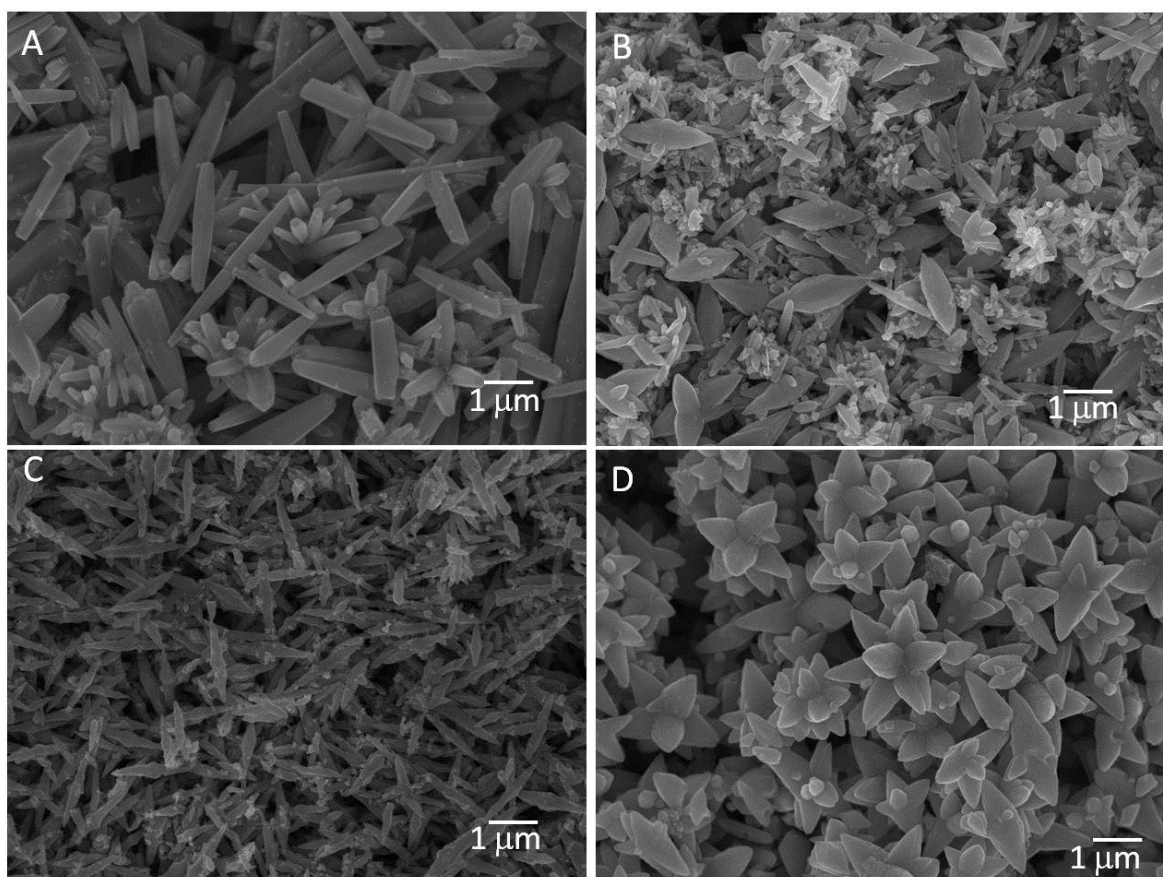

**Figure S1.** Typical SEM images sintered ZnO films obtained from the ZnO nanomaterials prepared by the sonochemical method at different pH values. A: pH 5.5; B: pH 8; C: pH 10; and D: pH 12.

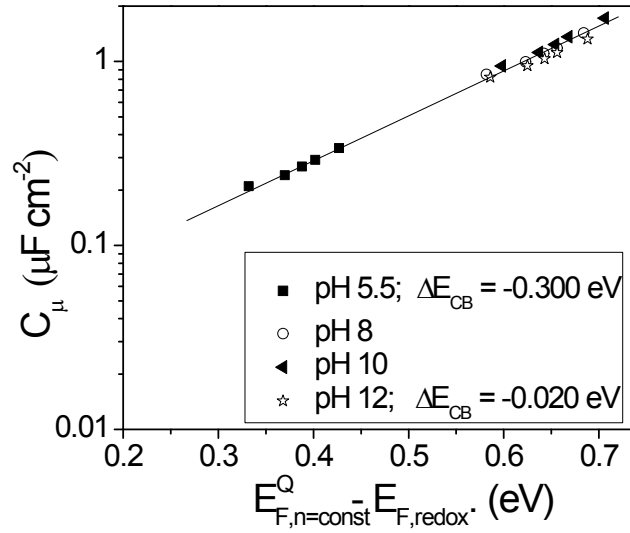

**Figure S2.** Chemical capacitance extracted from EIS measurements versus the quasi-Fermi level of electrons in the ZnO corrected for a shift of the band edges, thus describing the energetic distribution of traps at the ZnO surface.

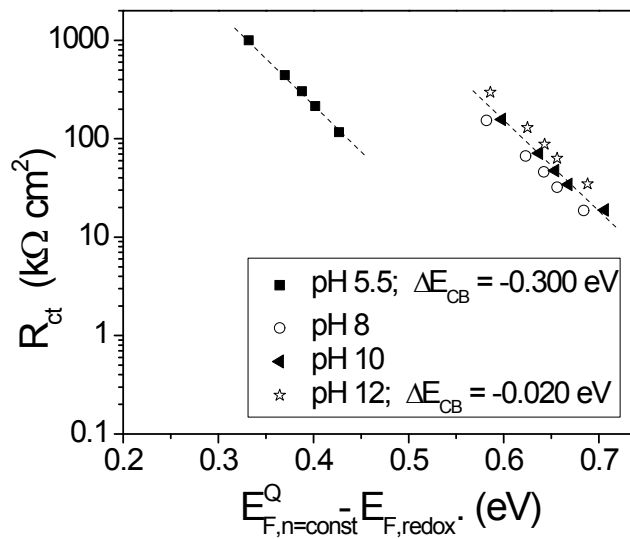

**Figure S3.** Charge transfer resistance extracted from EIS measurements versus the quasi-Fermi level of electrons in the ZnO nanostructures corrected for a shift of the band edges. It can be seen that the recombination resistance at a constant electron density in the ZnO film for the material prepared at pH 5.5 is significantly lower than for the other three materials.
